# Supplementary material for: G protein-coupled receptor 35 attenuates nonalcoholic steatohepatitis by reprogramming cholesterol homeostasis in hepatocytes
Source: PubMed Central journal article supplement — Acta Pharm Sin B. 2022 Oct 13;13(3):1128–44. doi: 10.1016/j.apsb.2022.10.011 (PMC10031266; doi:10.1016/j.apsb.2022.10.011), 2022-10-13
Supplement: mmc1.pdf [file mmc1.pdf]

**Supporting Information for  
Original article**

**G protein-coupled receptor 35 attenuates nonalcoholic steatohepatitis  
by reprogramming cholesterol homeostasis in hepatocytes**

**Xiaoli Wei<sup>a,†</sup>, Fan Yin<sup>b,c,†</sup>, Miaomiao Wu<sup>a,c,†</sup>, Qianqian Xie<sup>c,d</sup>, Xueqin Zhao<sup>c,d</sup>,  
Cheng Zhu<sup>a</sup>, Ruiqian Xie<sup>c,d</sup>, Chongqing Chen<sup>c,d</sup>, Menghua Liu<sup>c,d</sup>, Xueying Wang<sup>a</sup>,  
Ruixue Ren<sup>a</sup>, Guijie Kang<sup>c,d</sup>, Chenwen Zhu<sup>a</sup>, Jingjing Cong<sup>c,d</sup>, Hua Wang<sup>a,d,\*</sup>,  
Xuefu Wang<sup>c,d,\*</sup>**

*<sup>a</sup>Department of Oncology, the First Affiliated Hospital of Anhui Medical University,  
Hefei 230036, China*

*<sup>b</sup>Department of Pharmacy, Huainan First People's Hospital, the First Affiliated  
Hospital of Anhui University of Science and Technology, Huainan 232001, China*

*<sup>c</sup>School of Pharmacy, Anhui Medical University, Hefei 230032, China*

*<sup>d</sup>Inflammation and Immune Mediated Diseases Laboratory of Anhui Province, Anhui  
Medical University, Hefei 230032, China*

Received 28 May 2022; received in revised form 8 August 2022; accepted 18 August  
2022

\*Corresponding authors.

E-mail addresses: [wangxuefu@ahmu.edu.cn](mailto:wangxuefu@ahmu.edu.cn) (Xuefu Wang), [wanghua@ahmu.edu.cn](mailto:wanghua@ahmu.edu.cn)  
(Hua Wang).

<sup>†</sup>These authors made equal contributions to this work.

## 1. Supporting tables

**Table S1** List primers for q-PCR.

| Gene<br>(Mouse) | Forward primer (5'–3')    | Reverse primer (5'–3')    |
|-----------------|---------------------------|---------------------------|
| <i>β-Actin</i>  | GGCTGTATTCCCCTCCATCG      | CCAGTTGGTAACAATGCCATGT    |
| <i>Gpr35</i>    | CAATACCTGTGCTGCCCCGAGAC   | GTGGCTGGCTTGGACGCTTC      |
| <i>Cyp27a1</i>  | AGACCATCGGCACCTTTCCTGAG   | GCACCACACCAGTCACTTCCTTG   |
| <i>Cyp7a1</i>   | GTGATGTTTGAAGCCGGATATC    | TTTATGTGCGGTCTTGAACAAG    |
| <i>Cyp8b1</i>   | TCCCCTATCTCTCAGTACACAT    | ACTTGTAGAAGTCCACTTTCCG    |
| <i>Cyp7b1</i>   | AACCCTTTCAGTACCAGTATG     | GTGAACGTCTTCATTAAGGTCG    |
| <i>Acat2</i>    | CGCTGCTGCTGTGGTCCCTTATG   | GCTTGCTTTATGGCTGGAATTGGTC |
| <i>Acc</i>      | GAAGCCACAGTGAAATCTCG      | GATGGTTTGGCCTTTCACAT      |
| <i>Ppara</i>    | AACATCGAGTGTCGAATATGTGG   | CCGAATAGTTCGCCGAAAGAA     |
| <i>Cpt1a</i>    | AGCCAGACTCCTCAGCAGCAG     | CACCATAGCCGTCATCAGCAACC   |
| <i>Tnfa</i>     | GAGAGAAAGTGAGTGCGTCCCTTG  | GGCAACAGCACCGCAGTACC      |
| <i>Il6</i>      | CTTCTTGGGACTGATGCTGGTGAC  | AGGTCTGTTGGGAGTGGTATCCTC  |
| <i>Il1β</i>     | TCGCAGCAGCACATCAACAAGAG   | AGGTCCACGGGAAAGACACAGG    |
| <i>Srebp1c</i>  | AACGTCACCTCCAGCTAGAC      | CCACTAAGGTGCCTACAGAGC     |
| <i>Abcg5</i>    | CATTGAAAGAGCACGATACCTG    | AGATTCTGAACGAGACGCATAA    |
| <i>Abcg8</i>    | GGACAAATTTGGATAAATGGGC    | GATTACGTCTTCCACCCGTTT     |
| <i>Abca1</i>    | CCTCAGAGAAAACAGAAAACCG    | CTTTGCTATGATCTGCACGTAC    |
| <i>Hmgcr</i>    | GGTGCAAAGTTCCTTAGTGATG    | GAATAGACACACCACGTTTCATG   |
| <i>Ldlr</i>     | CAGAAGTCGACACTGTACTGAC    | AAGATGGACAGGAACCTCATAAC   |
| <i>Srb1</i>     | AACATCACCTTCAATGACAACG    | ACCAAGATGTTAGGCAGTACAA    |
| <i>Npc1l1</i>   | CTGGCTGGCTCTCATCATCATCTTC | AGCCTGCTGTCTTGTCTTGTTC    |
| <i>Ntcp</i>     | CATGGAGTTCAGCAAGATCAAG    | CTCAATGCTGGTCAGATGAAAG    |
| <i>Bat</i>      | GGTGTAGAGTTTCTCCTGAGAC    | CAATCTCTGCTCCAATGCATAC    |
| <i>Bal</i>      | CCAAAACGATTGCTAAGAAGGT    | CAATGTCAGCAGTGTTGTTGTA    |
| <i>Hnf4a</i>    | TGAGGAAGAACCACATGTACTC    | GTAACGACACTGGTTCCTCTTA    |
| <i>Osta</i>     | CTCTGTTCCAGGTGCTTGTCTATCC | ATGTGGCAGTTCATCACTTGAGACC |
| <i>Ostb</i>     | GGAAGTCTGGAAGAAATGCTTTGG  | CCTTCTCAGGAGGAACATGCTTGTC |
| <i>Abcb11</i>   | GTGTCTACTTCATGCTTGTGAC    | GAGACTTAGATCGTTGACGGAT    |
| <i>Abcb4</i>    | TGATAGCTCACCGATTGTCTAC    | CGAGTCTGAAGTAGATCCCTTC    |
| <i>Ibabp</i>    | TTCAAGATCATCACAGAGGTCC    | CATGGTCTGCATTTACATTCT     |
| <i>Asbt</i>     | GCGACATGGACCTCAGTGTTAGC   | GTTCCCGAGTCAACCCACATCTTG  |

**Table S2** List for primary antibodies.

| Antibodies                        | Sources                   | Identifier      |
|-----------------------------------|---------------------------|-----------------|
| Anti-beta-Actin                   | Cell Signaling Technology | Cat# 3700       |
| Anti-Fatty Acid Synthase          | Cell Signaling Technology | Cat# 3180       |
| Anti-AKT                          | Cell Signaling Technology | Cat# 9272       |
| Anti-phospho-Akt                  | Cell Signaling Technology | Cat# 4060       |
| Anti-p44/42 MAPK (Erk1/2)         | Cell Signaling Technology | Cat# 4695       |
| Anti-phospho-p44/42 MAPK (Erk1/2) | Cell Signaling Technology | Cat# 4370       |
| Anti-p38 MAPK                     | Cell Signaling Technology | Cat# 9212       |
| Anti-phospho-p38 MAPK             | Cell Signaling Technology | Cat# 9216       |
| Anti-SAPK/JNK                     | Cell Signaling Technology | Cat# 9252       |
| Anti-phospho-SAPK/JNK             | Cell Signaling Technology | Cat# 9251       |
| Anti-IRE1 $\alpha$                | Cell Signaling Technology | Cat# 3294       |
| Anti-phospho-ERK5                 | Cell Signaling Technology | Cat# 3371       |
| Anti-CREB                         | Cell Signaling Technology | Cat# 9197       |
| Anti-phospho-CREB                 | Cell Signaling Technology | Cat# 9198       |
| Anti-ERK5                         | Abcam                     | Cat# ab40809    |
| Anti-GRP78                        | Abcam                     | Cat# ab108613   |
| Anti-ATF6                         | Abcam                     | Cat# ab227830   |
| Anti-Cpt1 $\alpha$                | Abcam                     | Cat# ab234111   |
| Anti-STARD4                       | Abcam                     | Cat# ab202060   |
| Anti-ACAT2                        | Abcam                     | Cat# ab191431   |
| Anti-SR-BI                        | Abcam                     | Cat# ab217318   |
| Anti-CYP27A1                      | Abcam                     | Cat# ab126785   |
| Anti-SREBP1                       | Abcam                     | Cat# ab28481    |
| Anti-SREBP2                       | Santa Cruz Biotechnology  | Cat# sc-13552   |
| Anti-CYP8B1                       | Santa Cruz Biotechnology  | Cat# sc-101387  |
| Anti-GPR35                        | Novus Biologicals         | Cat# NBP2-24640 |
| Anti-CYP7A1                       | Affinity Biosciences      | Cat# DF2612     |
| Anti-CYP7B1                       | Proteintech               | Cat# 24889-1-AP |
| Anti-CHOP                         | Proteintech               | Cat# 15204-1-AP |
| Anti-PERK                         | Proteintech               | Cat# 20582-1-AP |

## 2. Supporting figures

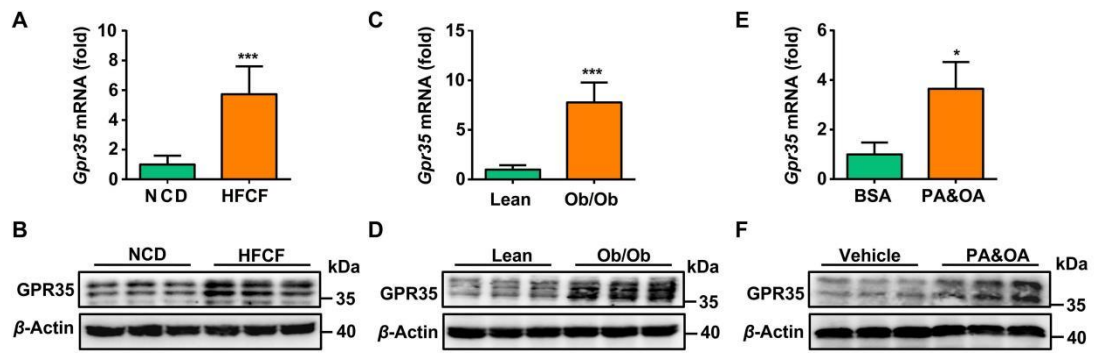

**Figure S1** GPR35 expression in hepatocytes is increased significantly in NAFLD. (A) Relative mRNA expression and (B) representative Western blot of GPR35 in hepatocytes isolated from WT mice fed a NCD or HFCE for 16 weeks ( $n = 6$ ). (C) Relative mRNA expression and (D) representative Western blot of GPR35 in hepatocytes isolated from WT and *ob/ob* mice ( $n = 6$ ). (E) Relative mRNA expression and (F) representative western blot of GPR35 in primary hepatocytes treated with PA&OA or BSA for 24 h ( $n = 3$ ). The mRNA expression of genes was normalized to that of  $\beta$ -actin. Data are the mean  $\pm$  SD; \* $P < 0.05$ , \*\* $P < 0.01$ , \*\*\* $P < 0.001$ . PA, palmitic acid; OA, oleic acid.

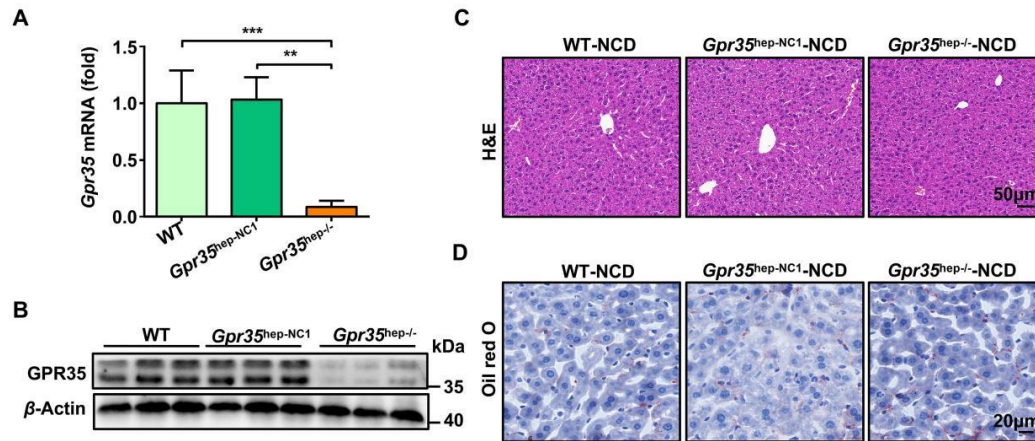

**Figure S2** GPR35 knockout in hepatocytes ( $n = 3$ ). C57BL/6J mice were injected (i.v.) with AAV8-TBG-SaCas9-2A-EGFP-U6-sgRNA (NC) or AAV8-TBG-SaCas9-2A-EGFP-U6-sgRNA (*Gpr35*). Control (*Gpr35*<sup>hep-NC1</sup>) and hepatocyte *Gpr35*-knockout (*Gpr35*<sup>hep-/-</sup>) mice were generated 1 week later. (A) Relative mRNA expression of *Gpr35* in primary hepatocytes. The mRNA expression of genes was normalized to that of  $\beta$ -actin. (B) Representative western blot of GPR35 in primary hepatocytes. (C) H&E staining of liver tissue sections. Scale bar, 50  $\mu$ m. (D) Oil Red O staining of liver tissue sections. Scale bar, 20  $\mu$ m. Data are the mean  $\pm$  SD; \*\* $P < 0.01$ , \*\*\* $P < 0.001$ .

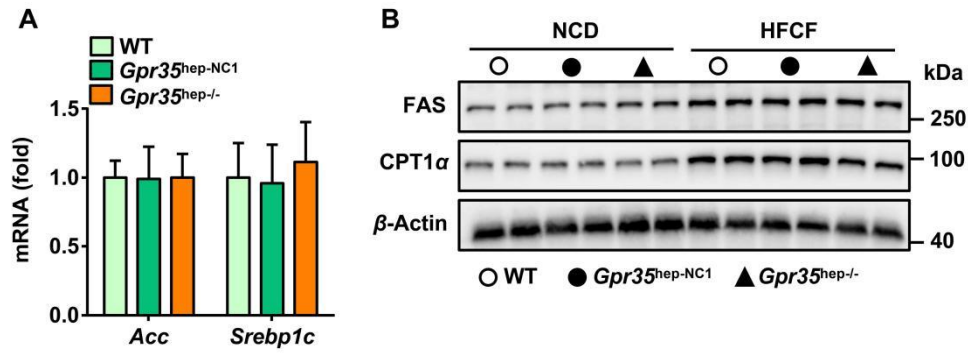

**Figure S3** Loss of GPR35 in hepatocytes reduces the expression of the genes involved in fatty acid oxidation but not *de novo* lipogenesis in the livers of mice fed a HFCF diet ( $n = 10$ ). C57BL/6J mice were injected (i.v.) with AAV8-TBG-SaCas9-2A-EGFP-U6-sgRNA (NC) or AAV8-TBG-SaCas9-2A-EGFP-U6-sgRNA (*Gpr35*) to generate control (*Gpr35*<sup>hep-NC1</sup>) mice and hepatocyte *Gpr35*-knockout (*Gpr35*<sup>hep-/-</sup>) mice, which were then fed the NCD or HFCF diet for 16 weeks. (A) Relative mRNA expression of *Acc* and *Srebp1c* in the livers of mice fed the HFCF. The mRNA expression of genes was normalized to that of  $\beta$ -actin. (B) Representative Western blot of FAS and CPT1 $\alpha$  in the livers of mice fed the NCD or HFCF diet. Data are the mean  $\pm$  SD.

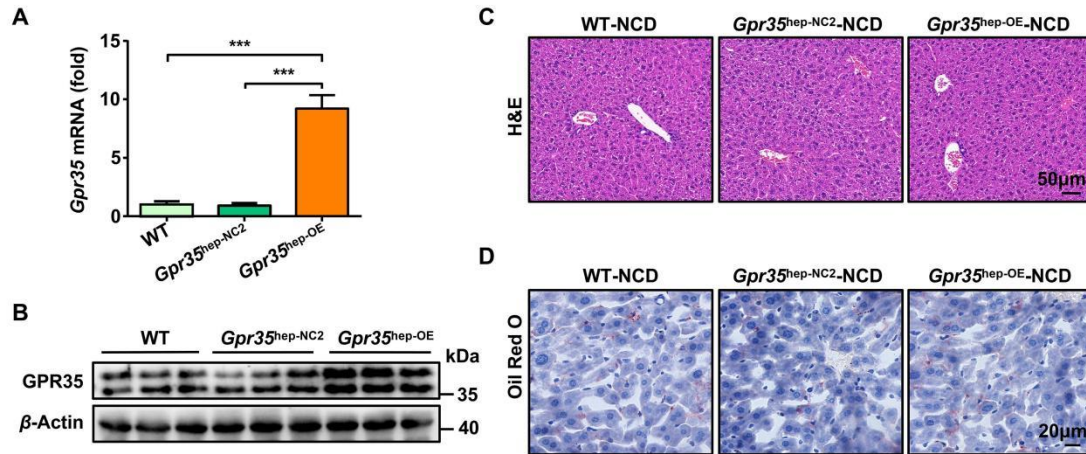

**Figure S4** GPR35 overexpression in hepatocytes ( $n = 3$ ). C57BL/6J mice were injected (i.v.) with AAV8-TBG-MCS-EGFP-3Flag-SV40 PolyA(NC) or AAV8-TBG-MCS-*Gpr35*-EGFP-3Flag-SV40 PolyA. Control (*Gpr35<sup>hep-NC2</sup>*) mice and hepatocyte *Gpr35*-overexpressing (*Gpr35<sup>hep-OE</sup>*) mice were generated 1 week later. (A) Relative mRNA expression of *Gpr35* in primary hepatocytes. The mRNA expression of genes was normalized to that of  $\beta$ -actin. (B) Representative Western blot of GPR35 in primary hepatocytes. (C) H&E staining of liver tissue sections. Scale bar, 50  $\mu$ m. (D) Oil Red O staining of liver tissue sections. Scale bar, 20  $\mu$ m. Data are the mean  $\pm$  SD; \*\*\* $P < 0.001$ .

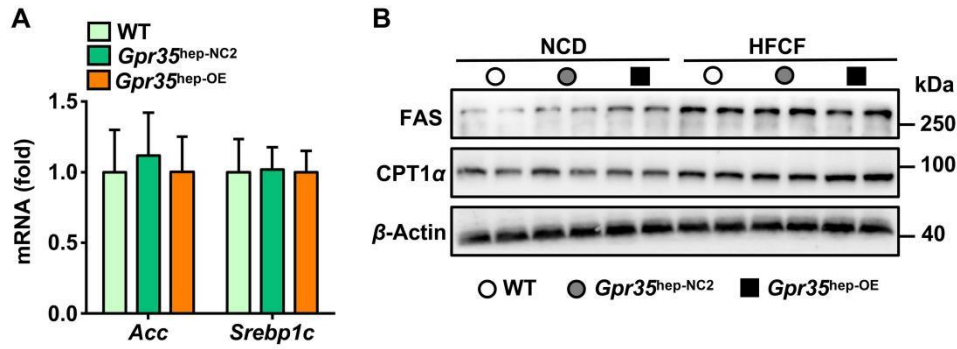

**Figure S5** GPR35 overexpression in hepatocytes increases the expression of the genes involved in fatty acid oxidation but not *de novo* lipogenesis in the livers of mice fed the HFCF diet ( $n = 10$ ). C57BL/6J mice were injected (i.v.) with AAV8-TBG-MCS-EGFP-3Flag-SV40 PolyA(NC) or AAV8-TBG-MCS-*Gpr35*-EGFP-3Flag-SV40 PolyA to generate control (*Gpr35*<sup>hep-NC2</sup>) mice and hepatocyte *Gpr35*-overexpressing (*Gpr35*<sup>hep-OE</sup>) mice, which were then fed a NCD or HFCF diet for 16 weeks. (A) Relative mRNA expression of *Acc* and *Srebp1c* in the livers of mice fed the HFCF diet. The mRNA expression of genes was normalized to that of  $\beta$ -actin. (B) Representative Western blot of FAS and CPT1 $\alpha$  in the livers of mice fed the NCD or HFCF diet. Data are the mean  $\pm$  SD.



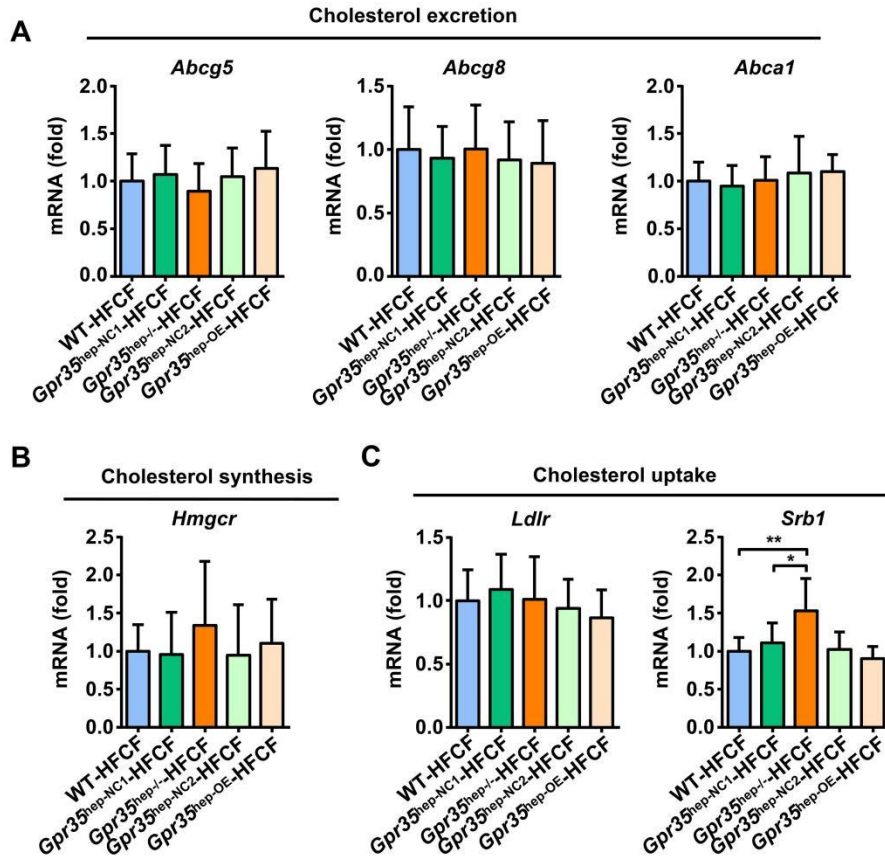

**Figure S6** GPR35 expression in hepatocytes does not affect the excretion, synthesis, or uptake of cholesterol in a HFCF diet-induced NASH model ( $n = 10$ ). WT, *Gpr35<sup>hep-NC1</sup>*, *Gpr35<sup>hep-/-</sup>*, *Gpr35<sup>hep-NC2</sup>*, and *Gpr35<sup>hep-OE</sup>* mice were fed a HFCF diet for 16 weeks. Relative mRNA expression of genes involved in the (A) excretion (*Abcg5*, *Abcg8*, *Abca1*), (B) synthesis (*Hmgcr*), and (C) uptake (*Ldlr*, *Srb1*) of cholesterol in the liver. The mRNA expression of genes was normalized to that of  $\beta$ -actin. Data are the mean  $\pm$  SD.

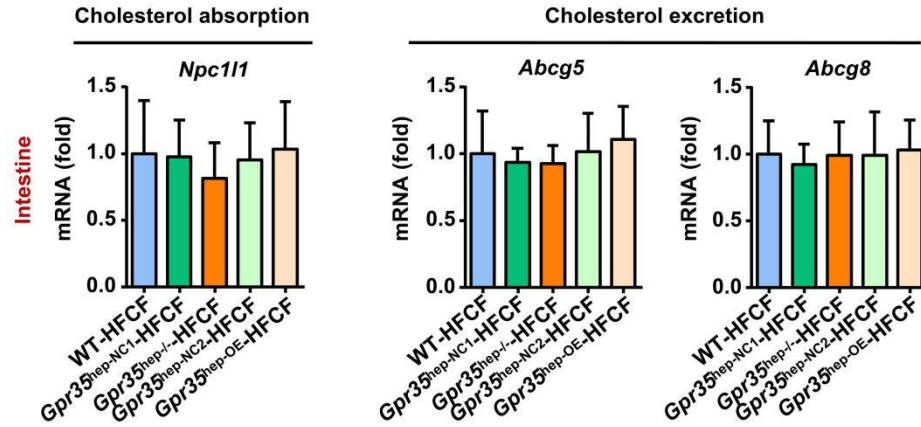

**Figure S7** GPR35 expression in hepatocytes does not affect the intestinal absorption and excretion of cholesterol in a HFCF diet-induced NASH model ( $n = 10$ ). WT, *Gpr35<sup>hep-NC1</sup>*, *Gpr35<sup>hep-/-</sup>*, *Gpr35<sup>hep-NC2</sup>*, and *Gpr35<sup>hep-OE</sup>* mice were fed a HFCF diet for 16 weeks. Relative mRNA expression of genes involved in the absorption (*Npc1l1*) and excretion (*Abcg5* and *Abcg8*) of cholesterol in the intestine. The mRNA expression of genes was normalized to that of  $\beta$ -actin. Data are the mean  $\pm$  SD.

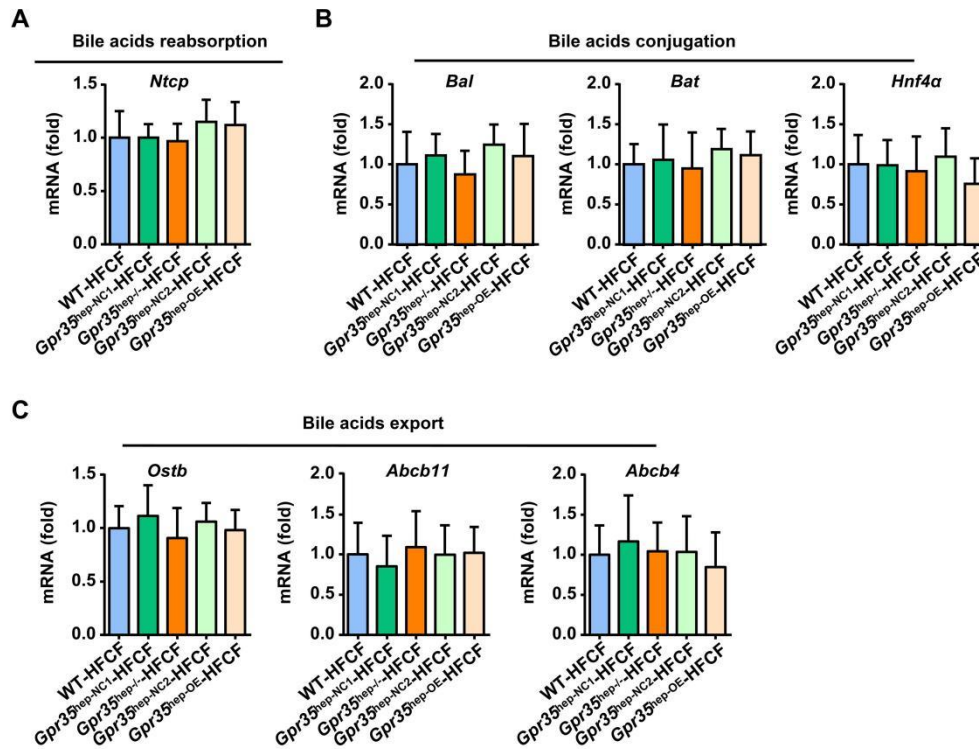

**Figure S8** GPR35 expression in hepatocytes does not affect the reabsorption, conjugation, and export of bile acids in the liver in a HFHF diet-induced NASH model ( $n = 10$ ). WT, *Gpr35*<sup>hep-NC1</sup>, *Gpr35*<sup>hep-/-</sup>, *Gpr35*<sup>hep-NC2</sup>, and *Gpr35*<sup>hep-OE</sup> mice were fed a HFHF diet for 16 weeks. Relative mRNA expression of genes involved in the (A) reabsorption (*Ntcp*), (B) conjugation (*Bal*, *Bat*, *Hnf4a1*), and (C) export (*Abcb11*, *Abcb4*, *Ostb*) of bile acids in the liver. The mRNA expression of genes was normalized to that of  $\beta$ -actin. Data are the mean  $\pm$  SD.

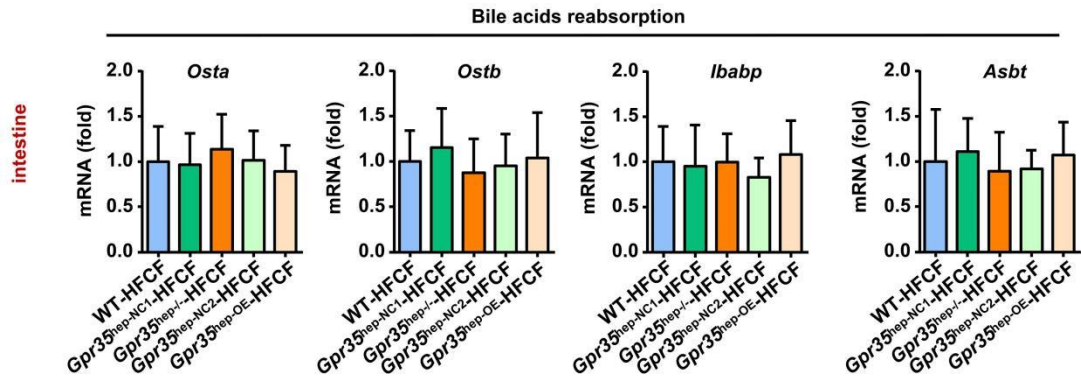

**Figure S9** GPR35 expression in hepatocytes does not affect intestinal reabsorption of bile acids in a HFCF diet-induced NASH model ( $n = 10$ ). WT, *Gpr35<sup>hep-NC1</sup>*, *Gpr35<sup>hep-/-</sup>*, *Gpr35<sup>hep-NC2</sup>*, and *Gpr35<sup>hep-OE</sup>* mice were fed a HFCF diet for 16 weeks. Relative mRNA expression of genes involved in the reabsorption (*Osta*, *Ostb*, *Ibabp*, *Asbt*) of bile acids in the intestine. The mRNA expression of genes was normalized to that of  $\beta$ -actin. Data are the mean  $\pm$  SD.

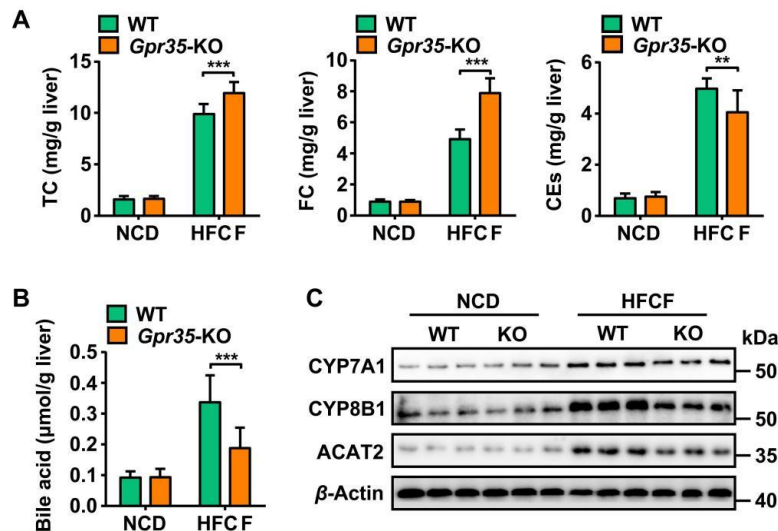

**Figure S10** Global deletion of GPR35 prevents ACAT2-mediated cholesterol esterification and CYP7A1-initiated synthesis of bile acids in the livers of HFCF diet-fed mice ( $n = 6$ ). WT and *Gpr35*-KO mice were fed a NCD or HFCF diet for 16 weeks. (A) TC, FC, and CEs levels in the liver. (B) Bile acid levels in the liver. (C) Representative Western blot of CYP7A1, CYP8B1, and ACAT2 in the liver. Data are the mean  $\pm$  SD; \* $P < 0.05$ , \*\* $P < 0.01$ , \*\*\* $P < 0.001$ .

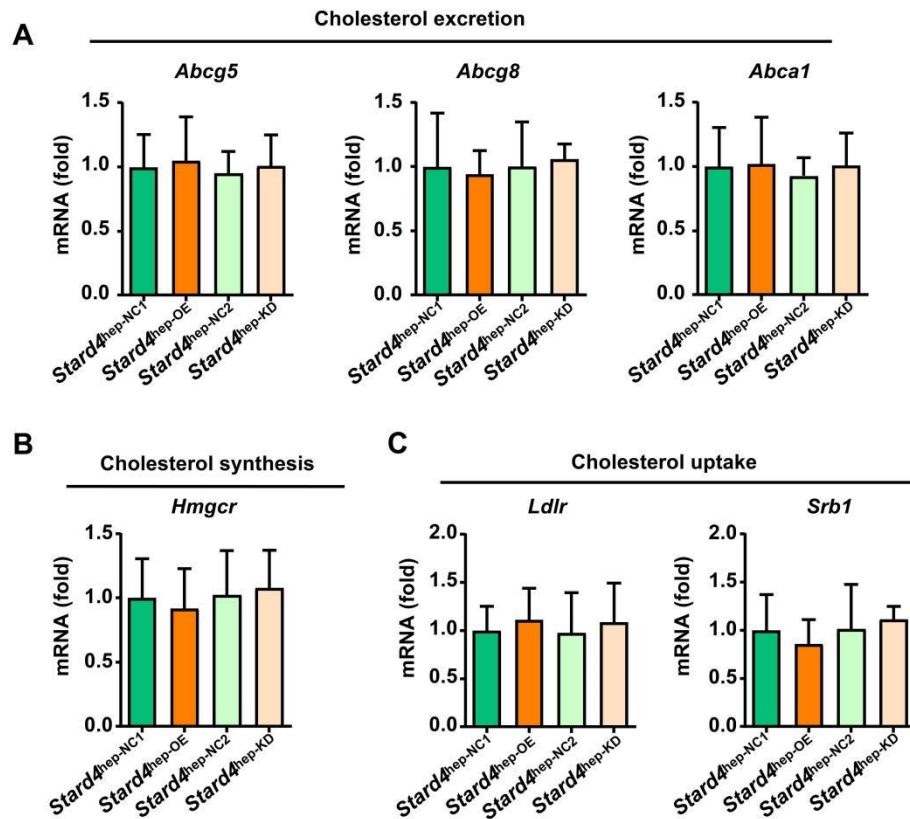

**Figure S11** STARD4 does not affect the excretion, synthesis, or uptake of cholesterol in the livers of HFCF diet-fed mice ( $n = 6$ ). C57BL/6J mice were injected (i.v.) with AAV8-TBG-m-NC-3xFlag-mCherry, AAV8-TBG-m-*Stard4*-3xFlag-mCherry, AV8-TBG-Mir30-m-shRNA(NC)-mCherry or AAV8-TBG-Mir30-m-shRNA(*Stard4*)-mCherry to generate *Stard4<sup>hep-NC1</sup>*, *Stard4<sup>hep-OE</sup>*, *Stard4<sup>hep-NC2</sup>*, and *Stard4<sup>hep-KD</sup>* mice, respectively, which were then fed a HFCF diet for 16 weeks. Relative mRNA expression of genes involved in the (A) excretion (*Abcg5*, *Abcg8*, *Abca1*), (B) synthesis (*Hmgcr*), and (C) uptake (*Ldlr*, *Srb1*) of cholesterol in the liver. The mRNA expression of genes was normalized to that of  $\beta$ -actin. Data are the mean  $\pm$  SD.

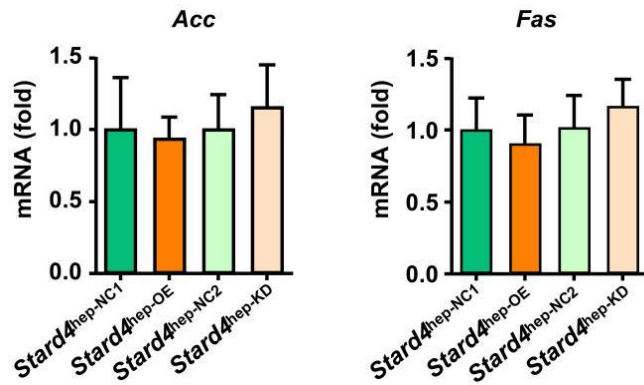

**Figure S12** STARD4 does not affect the *de novo* lipogenesis in the livers of HFCF diet-fed mice ( $n = 6$ ). C57BL/6J mice were injected (i.v.) with AAV8-TBG-m-NC-3xFlag-mCherry, AAV8-TBG-m-*Stard4*-3xFlag-mCherry, AV8-TBG-Mir30-m-shRNA(NC)-mCherry or AAV8-TBG-Mir30-m-shRNA(*Stard4*)-mCherry to generate *Stard4*<sup>hep-NC1</sup>, *Stard4*<sup>hep-OE</sup>, *Stard4*<sup>hep-NC2</sup>, and *Stard4*<sup>hep-KD</sup> mice, respectively, which were then fed a HFCF diet for 16 weeks. Relative mRNA expression of genes involved in the *de novo* lipogenesis (*Acc* and *Fas*) in the liver. The mRNA expression of genes was normalized to that of  $\beta$ -actin. Data are the mean  $\pm$  SD.

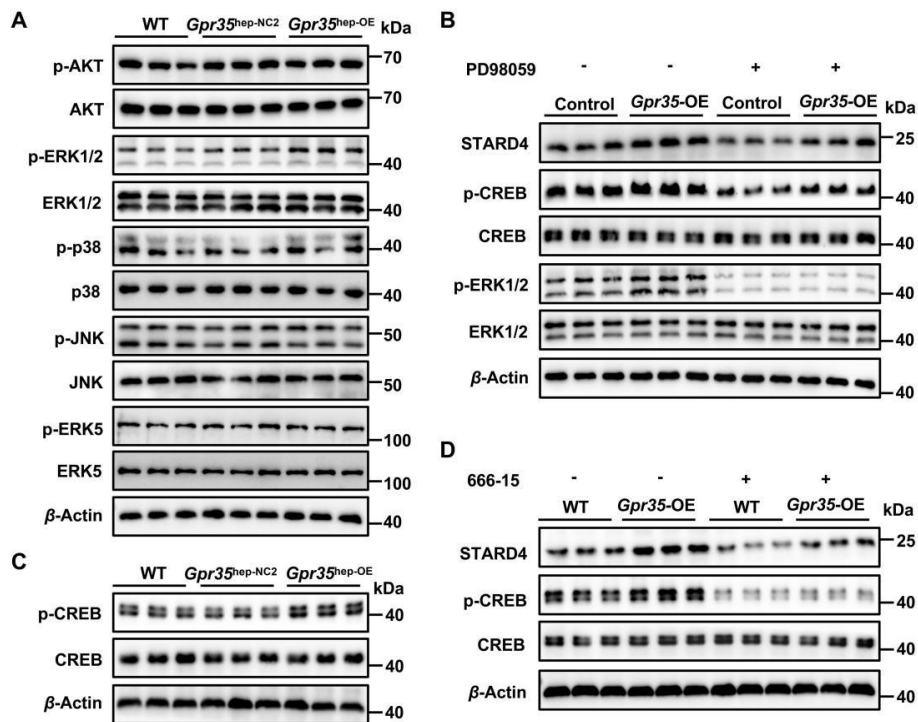

**Figure S13** Hepatocyte GPR35 induces STARD4 expression *via* the ERK1/2–CREB signaling pathway. (A) WT, *Gpr35*<sup>hep-NC2</sup>, and *Gpr35*<sup>hep-OE</sup> mice were fed a HFCD diet for 16 weeks. Representative western blot of p-AKT, AKT, p-ERK/2, ERK1/2, p-p38, p38, p-JNK, JNK, p-ERK5 and ERK5 proteins in the liver ( $n = 10$ ). (B) AML-12 cells were transfected with pEX-3-control or pEX-3-Mus *Gpr35* plasmids using Lipofectamine 2000 to generate control or GPR35-OE cells. GPR35-OE cells were then treated with Kyna (100  $\mu\text{mol/L}$ ) to activate GPR35. Representative Western blot of STARD4, p-CREB, CREB, p-ERK1/2 and ERK1/2 in AML-12 cells after PA&OA (0.5 mmol/L/1 mmol/L) treatment for 24 h with or without PD98059 pretreatment (20  $\mu\text{mol/L}$ ) for 2 h. (C) WT, *Gpr35*<sup>hep-NC2</sup>, and *Gpr35*<sup>hep-OE</sup> mice were fed a HFCD diet for 16 weeks. Representative Western blot of p-CREB and CREB proteins in the liver ( $n = 10$ ). (D) AML-12 cells were transfected with pEX-3-control or pEX-3-Mus *Gpr35* plasmids using Lipofectamine 2000 to generate control or GPR35-OE cells. GPR35-OE cells were then treated with Kyna to activate GPR35. Representative Western blot of STARD4, p-CREB, CREB, p-ERK1/2 and ERK1/2 in AML-12 cells after PA/OA (0.5 mmol/L/1 mmol/L) treatment for 24 h with or without 666-15 pretreatment (1  $\mu\text{mol/L}$ ) for 2 h. PA, palmitic acid; OA, oleic acid; PD98059, ERK inhibitor; 666-15, CREB inhibitor.

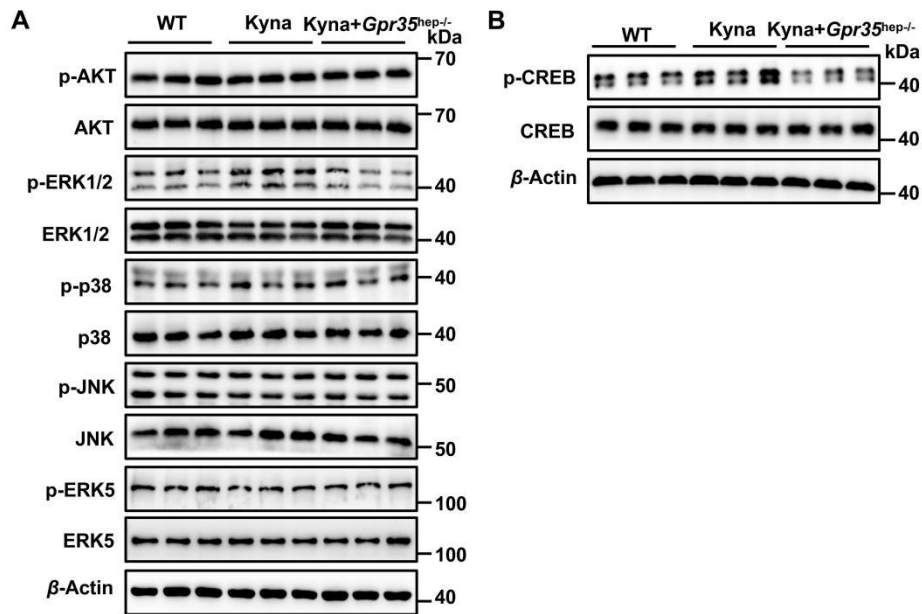

**Figure S14** Kyna/GPR35 activates the ERK1/2-CREB signaling pathway in the liver ( $n = 6$ ). After HFCF-diet feeding for 8 weeks, WT and *Gpr35*<sup>hep-/-</sup> mice were injected with Kyna (5 mg/kg body weight, i.p.) daily, and HFCF-diet feeding was continued for 8 weeks. (A) Representative western blot of p-AKT, AKT, p-ERK/2, ERK1/2, p-p38, p38, p-JNK, JNK, p-ERK5 and ERK5 proteins in the liver. (B) Representative western blot of p-CREB and CREB proteins in the liver. Kyna, kynurenic acid (an endogenous agonist of GPR35).
